# Supplementary material for: Bio-inspired multiscale-pore-network structured carbon felt with enhanced mass transfer and activity for vanadium redox flow batteries
Source: Royal Society of Chemistry journal article supplement (doi:10.1039/c8ta06445h), 2018-01-01
Supplement: c8ta06445h1.pdf [file c8ta06445h1.pdf]

## **Supporting Information**

### **Bio-inspired multiscale-pore-network structured carbon felt with enhanced mass transfer and activity for vanadium redox flow batteries**

Qixing Wu, Xiangyang Zhang, Yunhui Lv, Liyu Lin, Xuelong Zhou\*

Shenzhen Key Laboratory of New Lithium-ion Batteries and Mesoporous Materials,  
College of Chemistry and Environmental Engineering, Shenzhen University,  
Shenzhen 518060, People's Republic of China

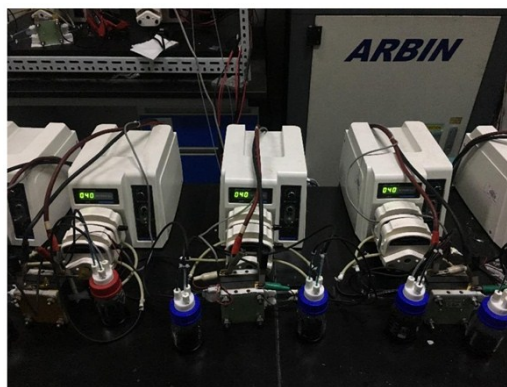

**Figure S1** Digital picture of the vanadium redox flow battery setups in this work.

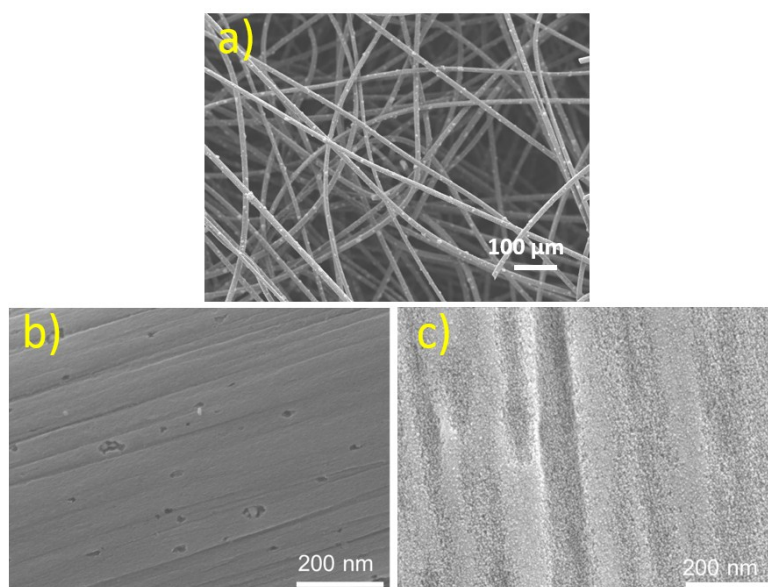

**Figure S2** SEM images of a) CF-ZnO-5, b) CF-pristine and c) CF-air.

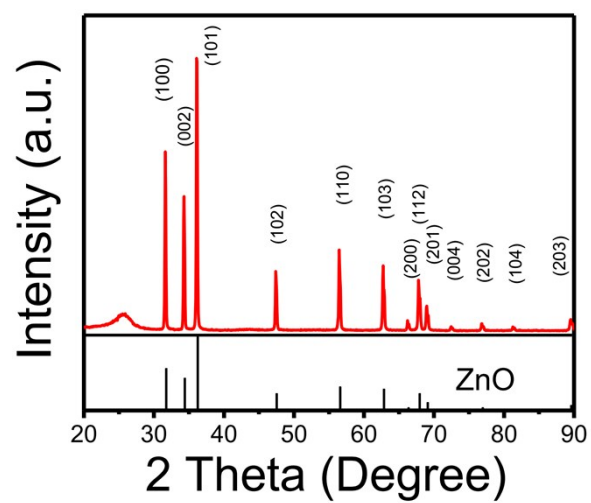

**Figure S3** XRD patterns of CF-ZnO-5.

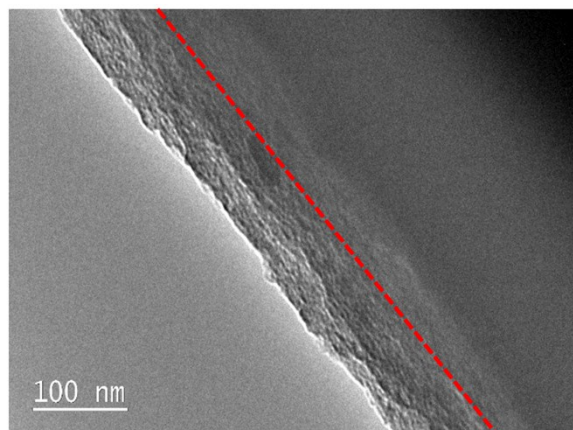

**Figure S4** TEM image of MPNCF-5.

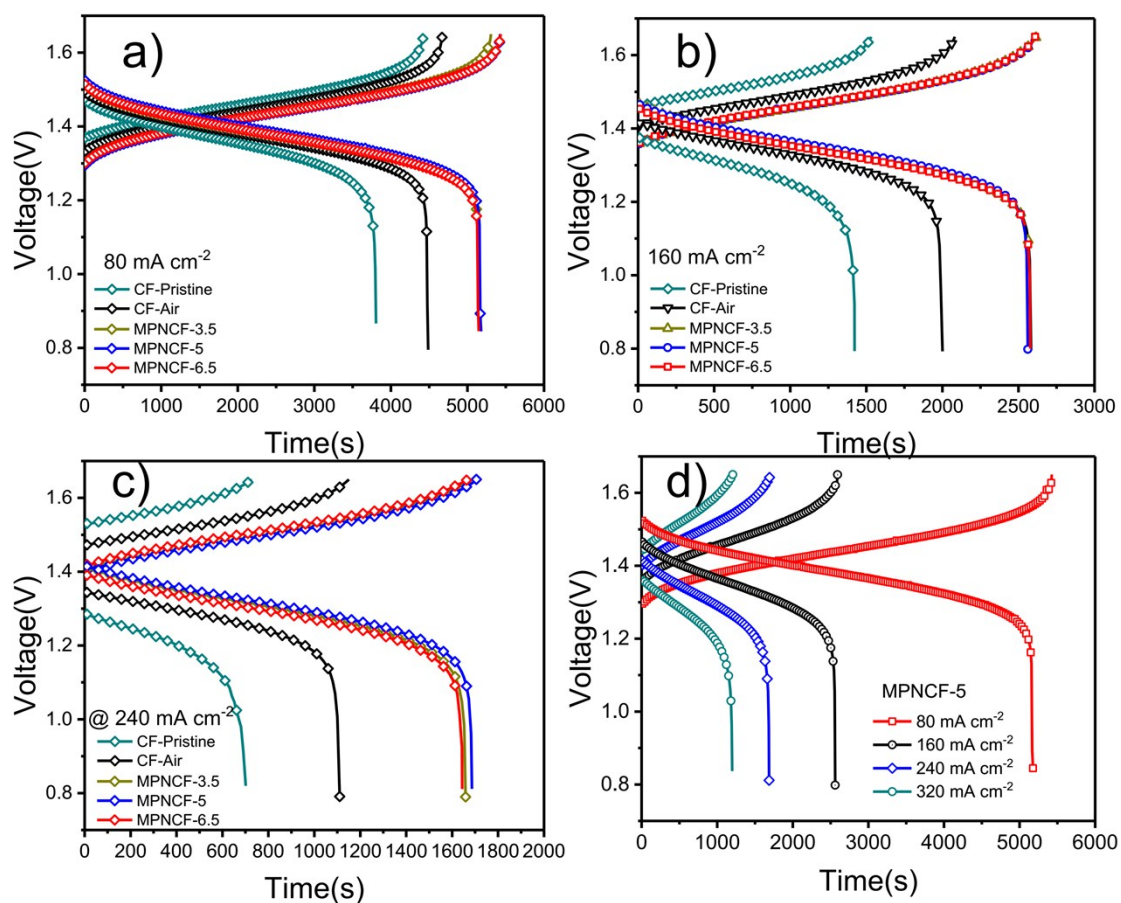

**Figure S5** Charge-discharge curves of batteries with different types of electrodes at a)  $80 \text{ mA cm}^{-2}$ , b)  $160 \text{ mA cm}^{-2}$ , and c)  $240 \text{ mA cm}^{-2}$ ; d) charge-discharge curves of battery with MPNCF-5 at different current densities.

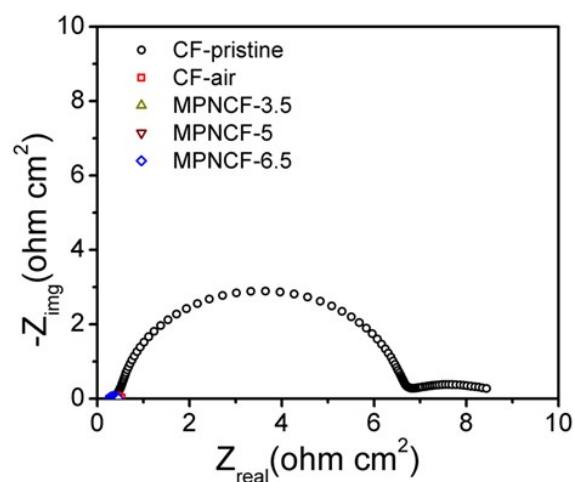

**Figure S6** Electrochemical impedance spectra of batteries with different types of electrodes at various current densities

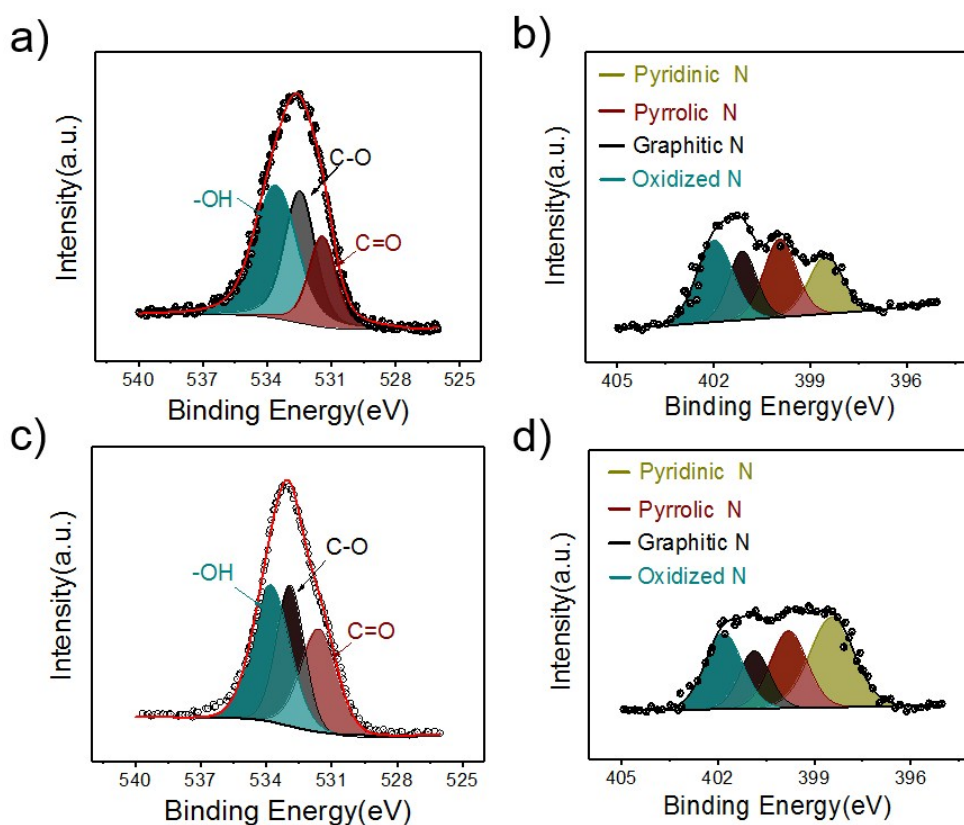

**Figure S7** XPS results from MPNCF-5 electrodes (after cycling test) in the O 1s for the negative electrode (a), N 1s for the negative electrode (b), the O 1s for the positive electrode (c), and N 1s for the positive electrode (d).

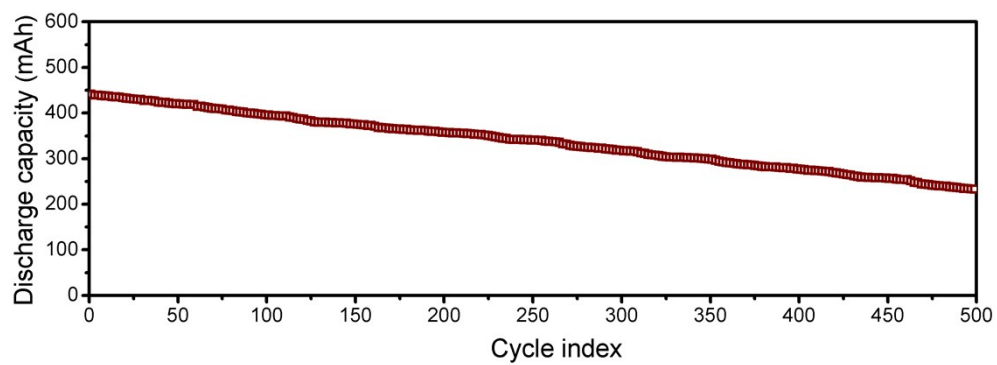

**Figure S8** Discharge capacity of battery with MPNCF-5 electrodes at  $320 \text{ mA cm}^{-2}$  during 500 cycles.

**Table S1** Summary of performance of VRFB with improved electrode in the open literature

| Electrode materials used | Feature                                  | Current density (mA cm <sup>-2</sup> ) | Energy efficiency (%) | References       |
|--------------------------|------------------------------------------|----------------------------------------|-----------------------|------------------|
| Carbon paper             | WO <sub>3</sub>                          | 50                                     | 80.5                  | 15               |
| Carbon paper             | CO <sub>2</sub>                          | 140                                    | 78.1                  | 16               |
| Graphite felt            | Bi                                       | 150                                    | 78                    | 17               |
| Graphite felt            | Nb <sub>2</sub> O <sub>5</sub>           | 150                                    | 77.6                  | 18               |
| Graphite felt            | ZrO <sub>2</sub>                         | 250                                    | 62.1                  | 19               |
| Graphite felt            | Corn protein-derived carbon              | 150                                    | 68.6                  | 20               |
| Carbon paper             | Mixed acid                               | 40                                     | 65.4                  | 21               |
| Graphite felt            | Sn                                       | 150                                    | 77.3                  | 24               |
| Carbon felt              | Graphene-nanowall                        | 125                                    | 76                    | 28               |
| <b>Carbon felt</b>       | <b>Multiscale pore-network structure</b> | <b>320</b>                             | <b>81.9</b>           | <b>This work</b> |

**Table S2** Species concentrations of different electrodes obtained by XPS results.

| Components | MPNCF-5 | MPNCF-5 (500  | MPNCF-5(500   |
|------------|---------|---------------|---------------|
|            |         | Cycles)       | Cycles)       |
|            |         | Negative side | Positive side |
| C 1s(%)    | 90.44   | 88.10         | 88.53         |
| O 1s(%)    | 7.58    | 10.02         | 9.89          |
| N 1s(%)    | 1.98    | 1.88          | 1.95          |
| C=O(%)     | 2.43    | 1.75          | 1.86          |
| C-O(%)     | 1.79    | 2.43          | 2.39          |
| C-O-(%)    | 3.36    | 5.84          | 5.64          |
